# Supplementary material
Source: PubMed Central journal article supplement (PMC1864868)

## Supplemental Figure Legends

Supplementary Figure 1. Human brain sections immunostained for both CD68 (red) and lactadherin (green). This section shows lactadherin expression in CD68-positive cells (yellow).

Supplementary Figure 2. Lactadherin expression (brow staining) in a cerebral artery.

Supplementary Figure 3. Time-dependent uptake of FITC-conjugated A $\beta$  1-42 microaggregates by murine bone marrow-derived macrophages in vitro. DAPI nuclear staining is shown in blue. The phagocytosed FITC-conjugated A $\beta$  micro-aggregates appears as fluorescent vesicles, beginning from 10 min following incubation with A $\beta$ . The phagocytosis index (both the % of positive cells and the mean fluorescence intensity, quantified using Histolab software, Microvision) reaches a maximum at 60 min. This is a representative example of three different experiments.

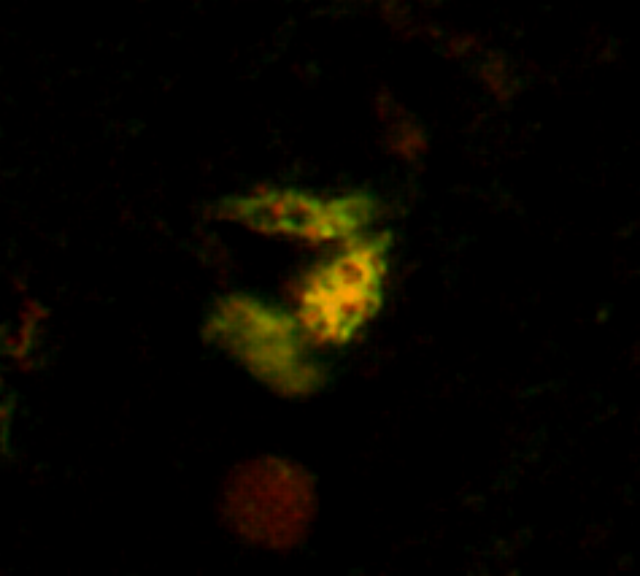

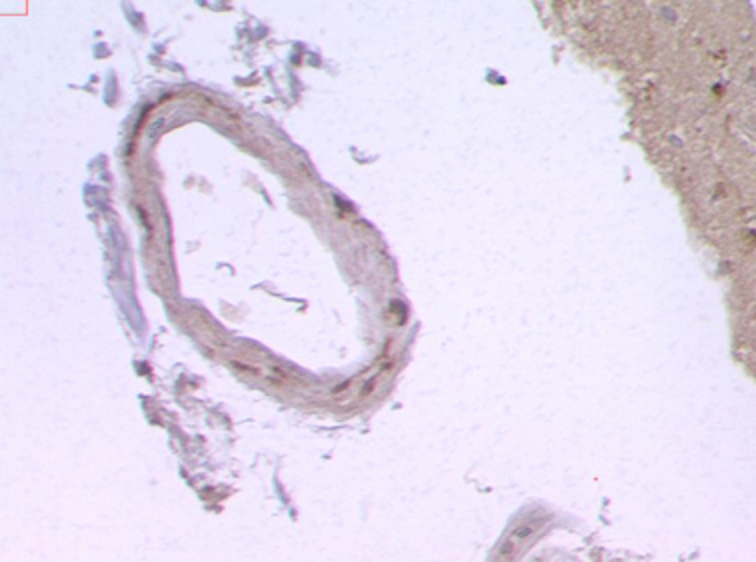

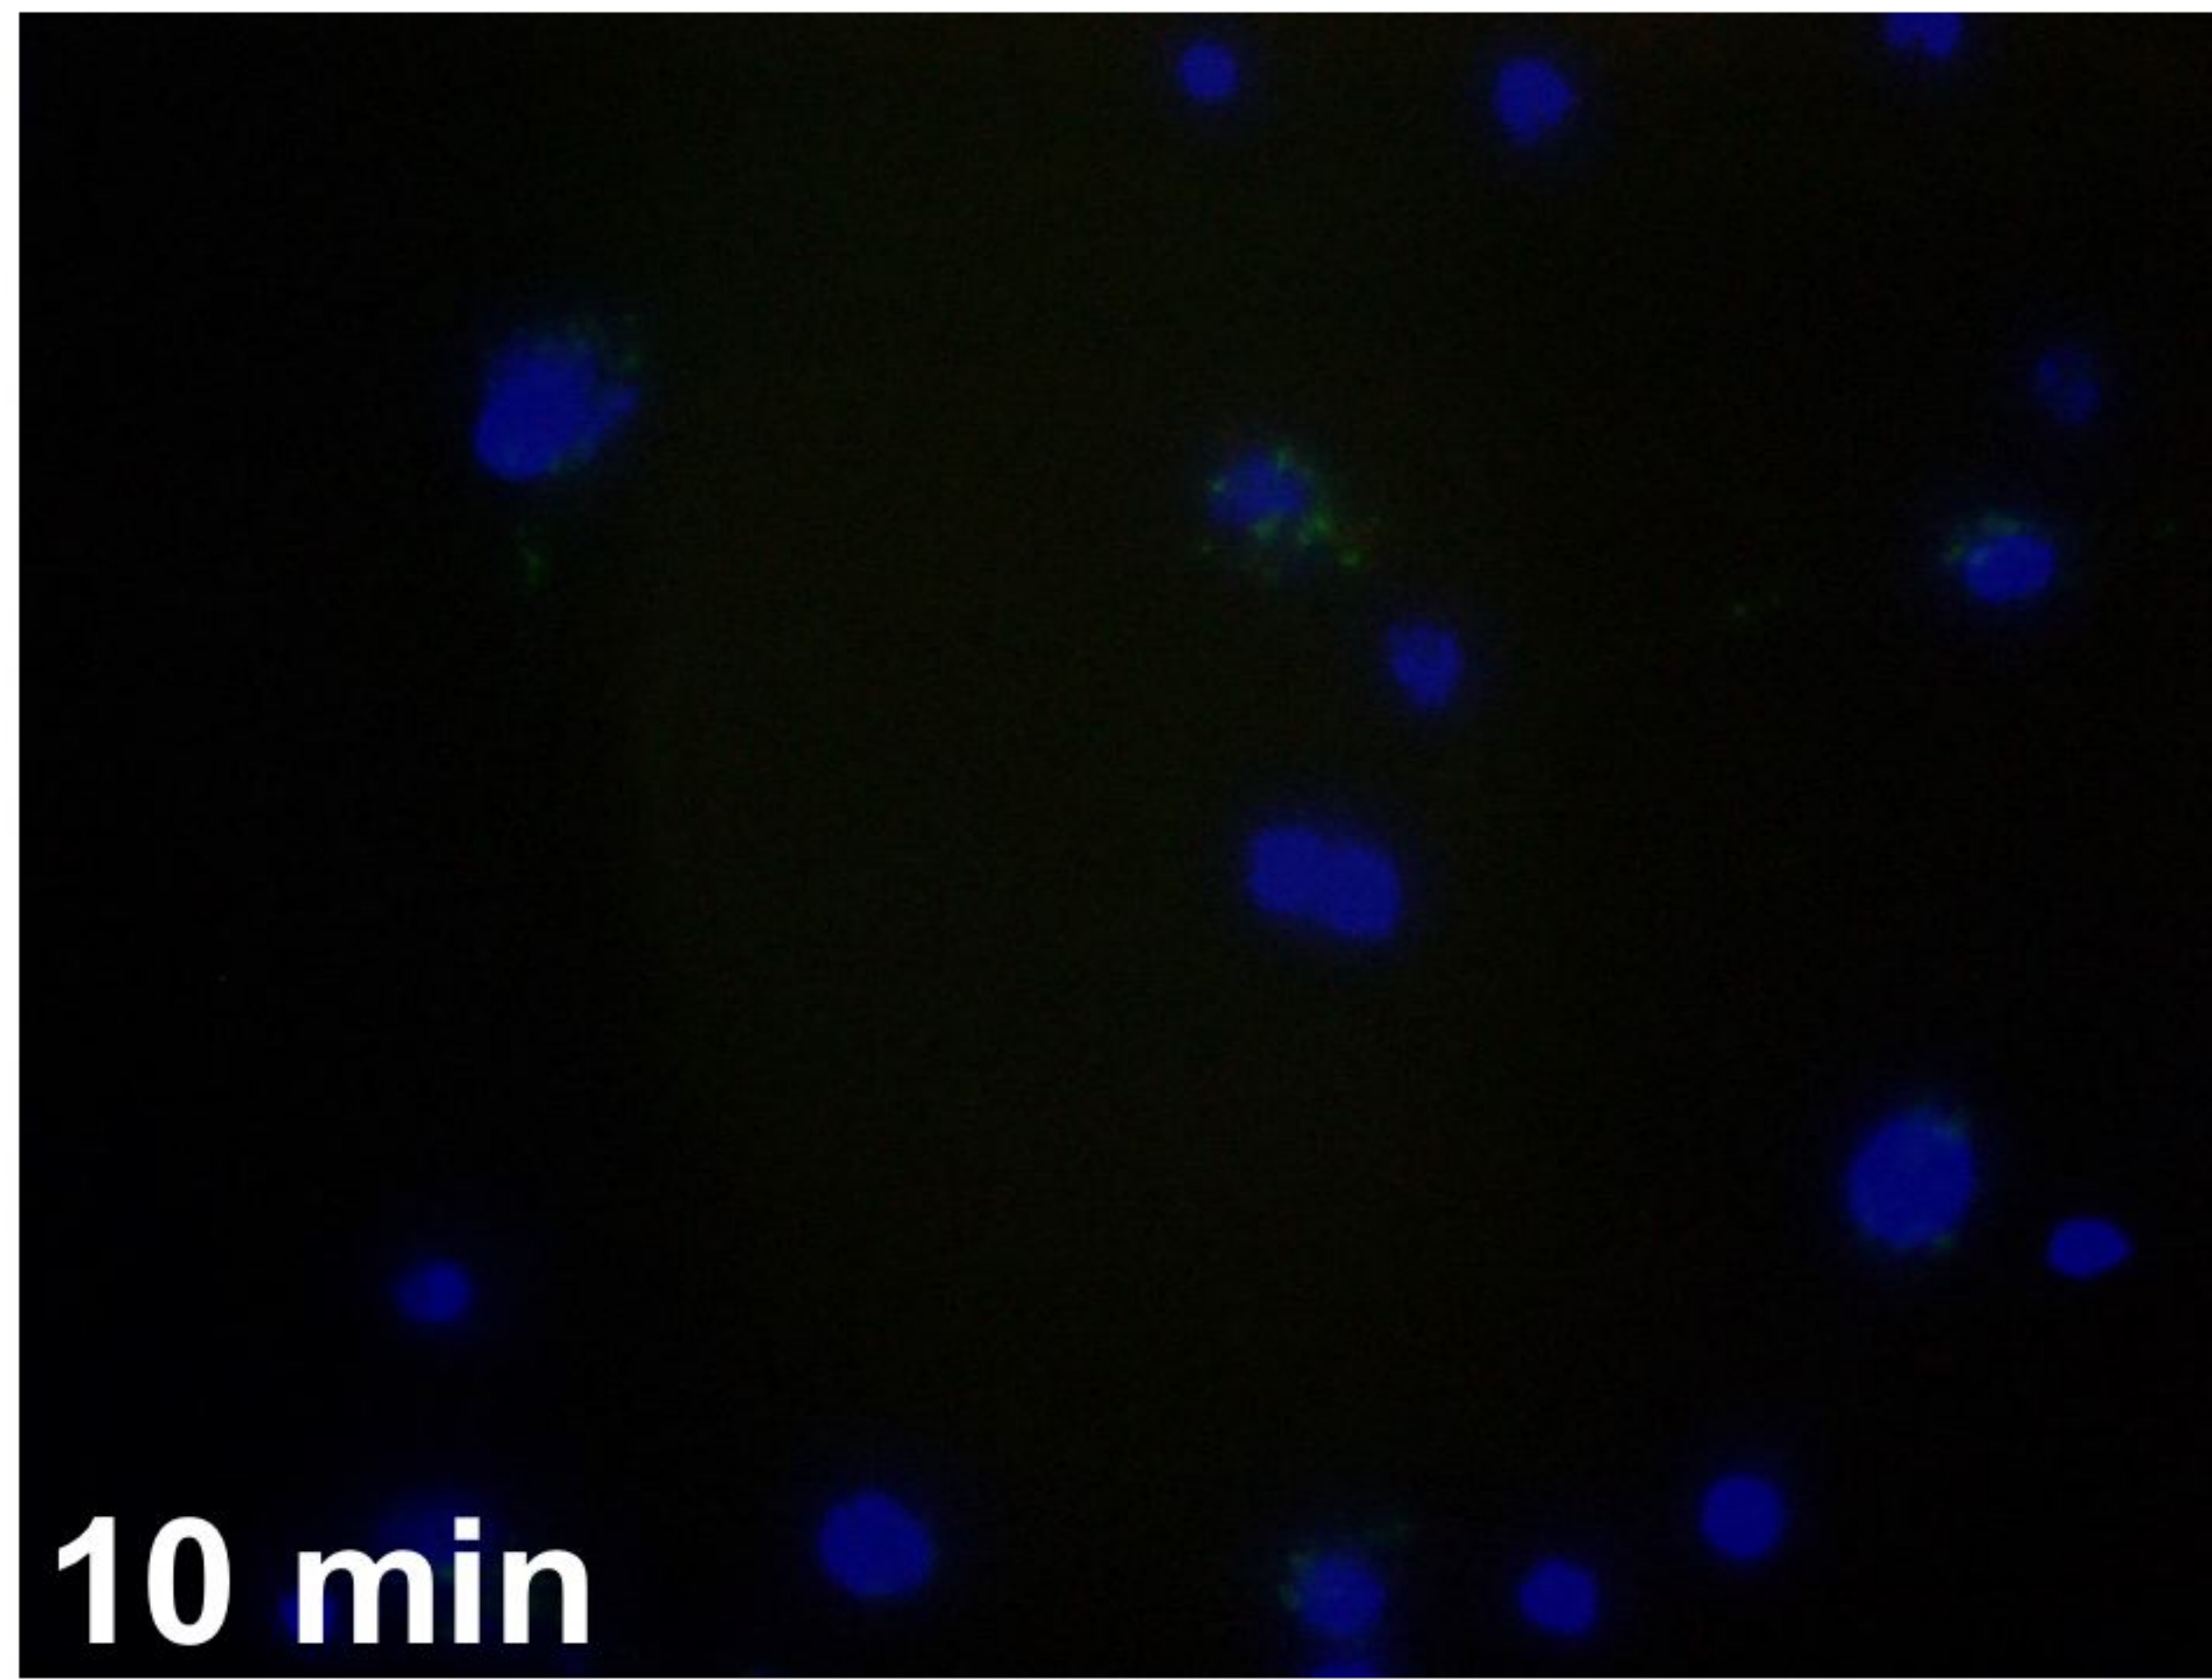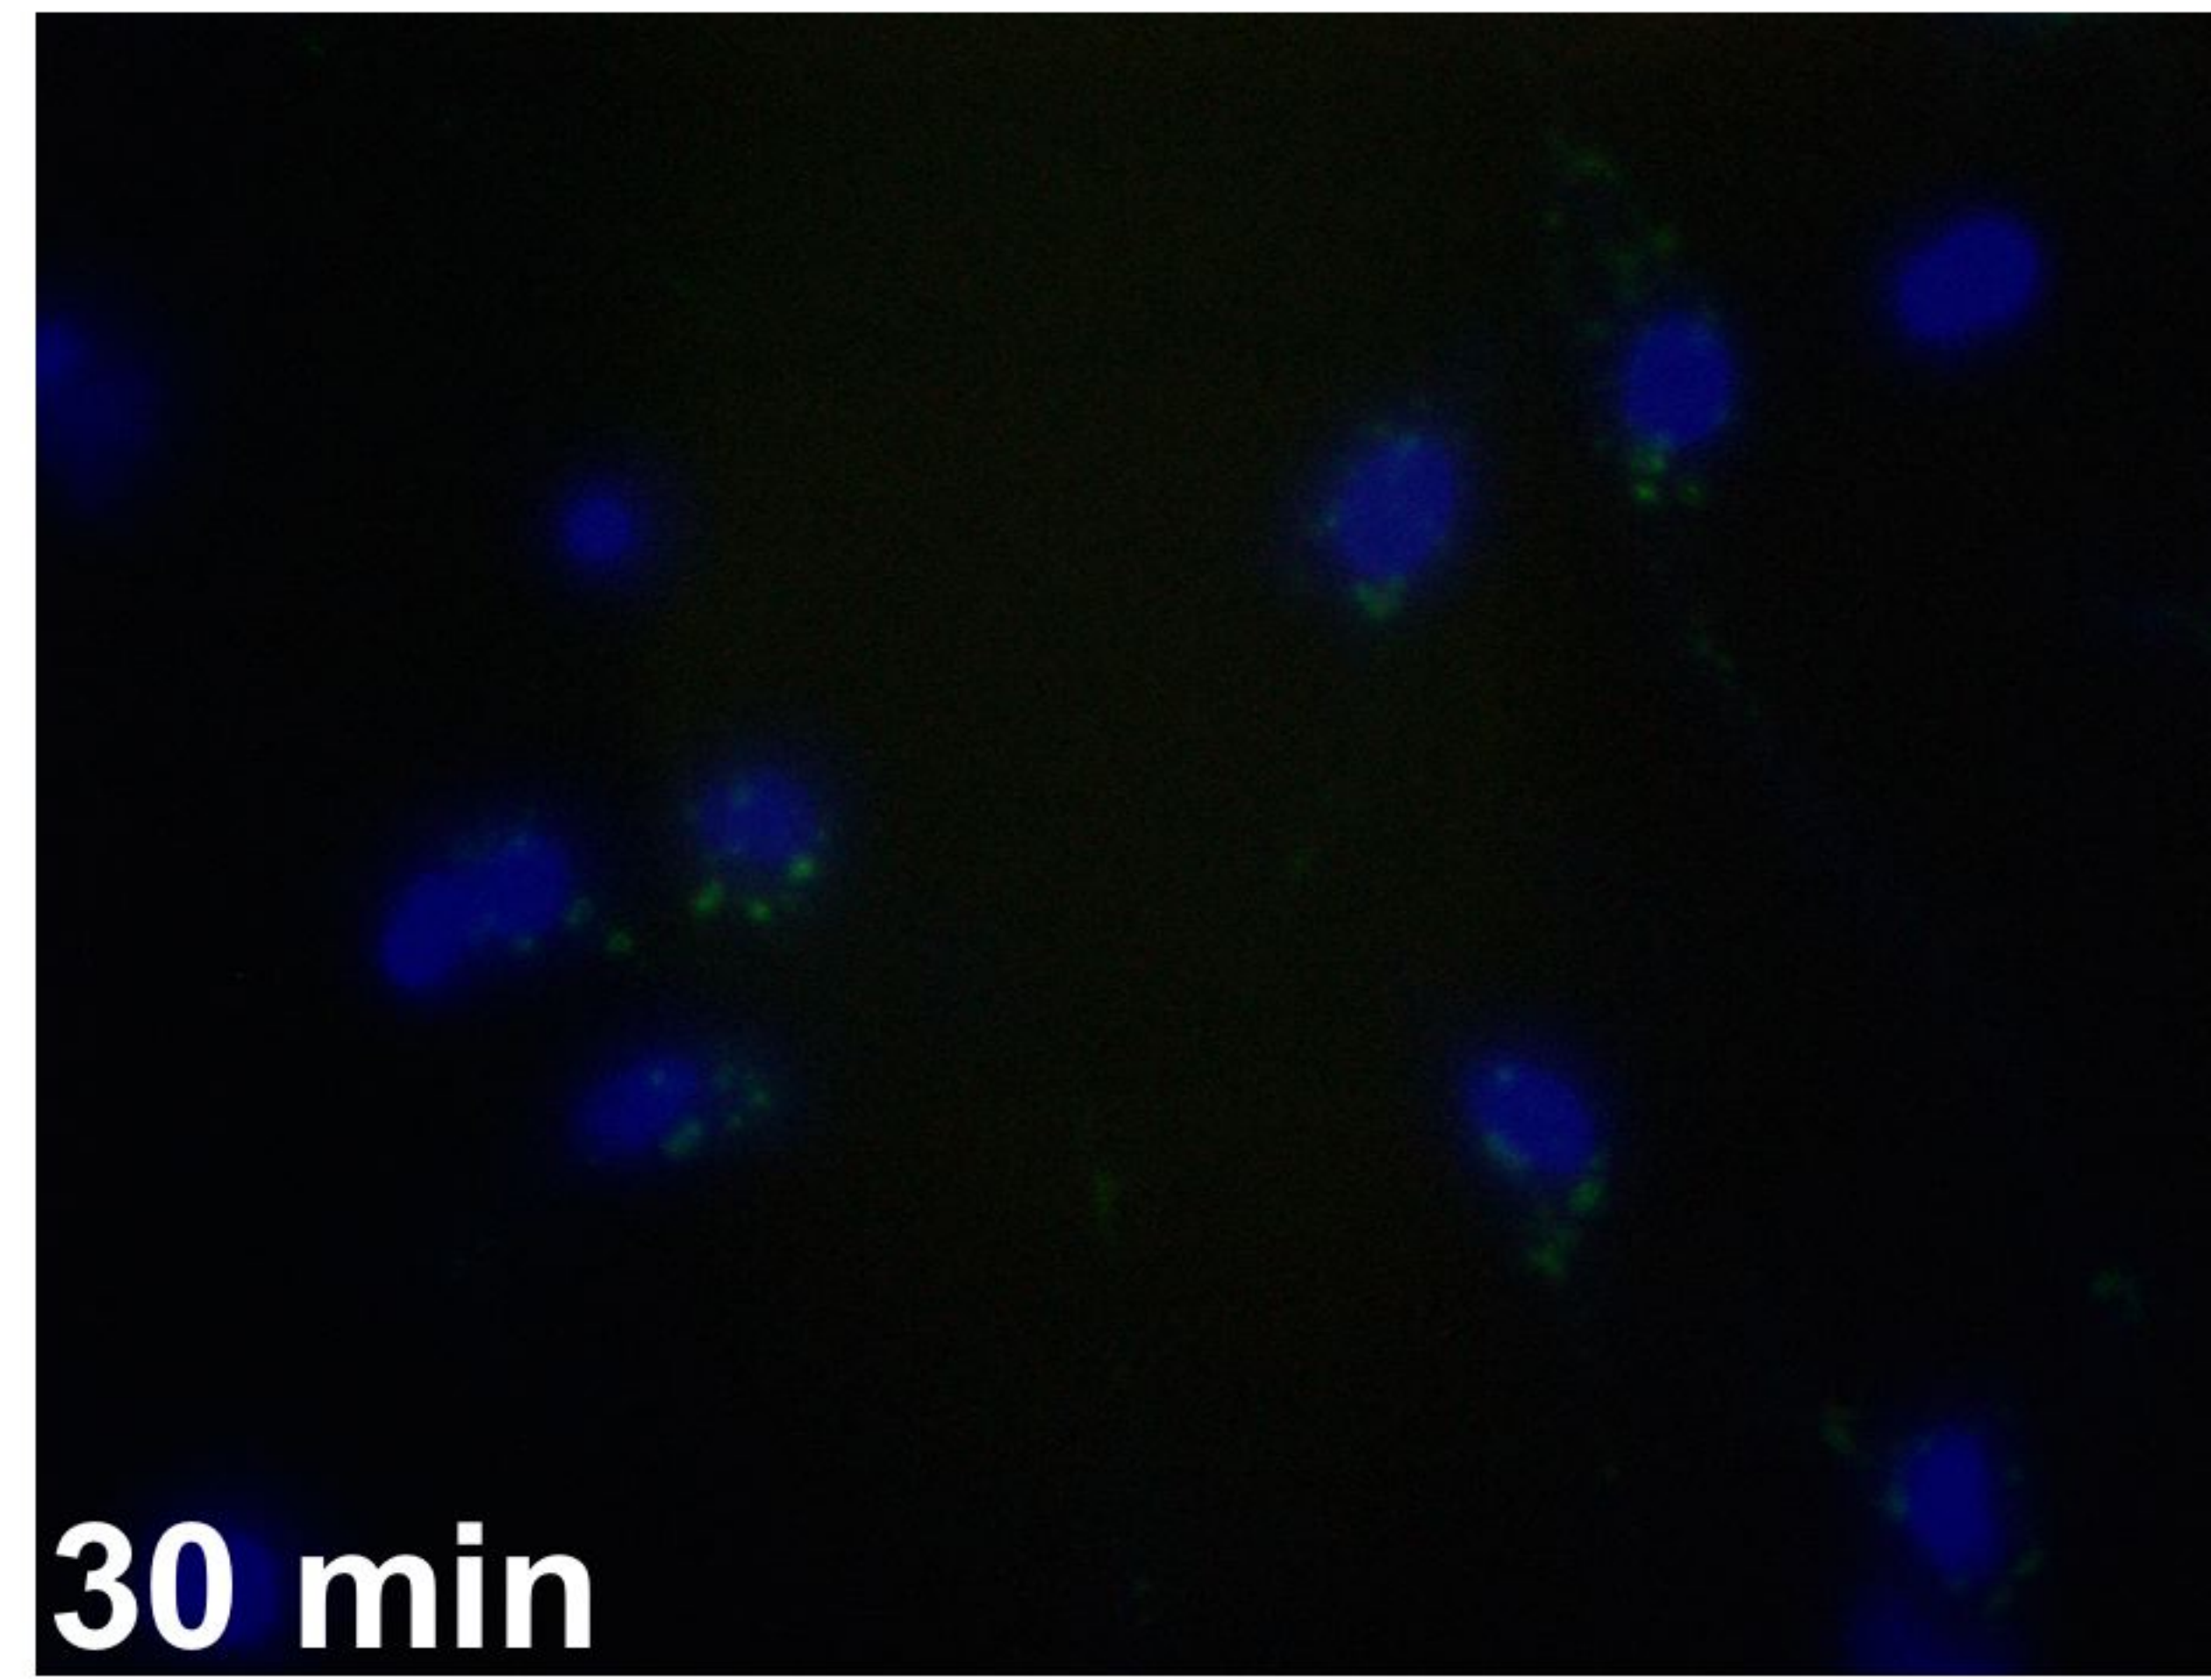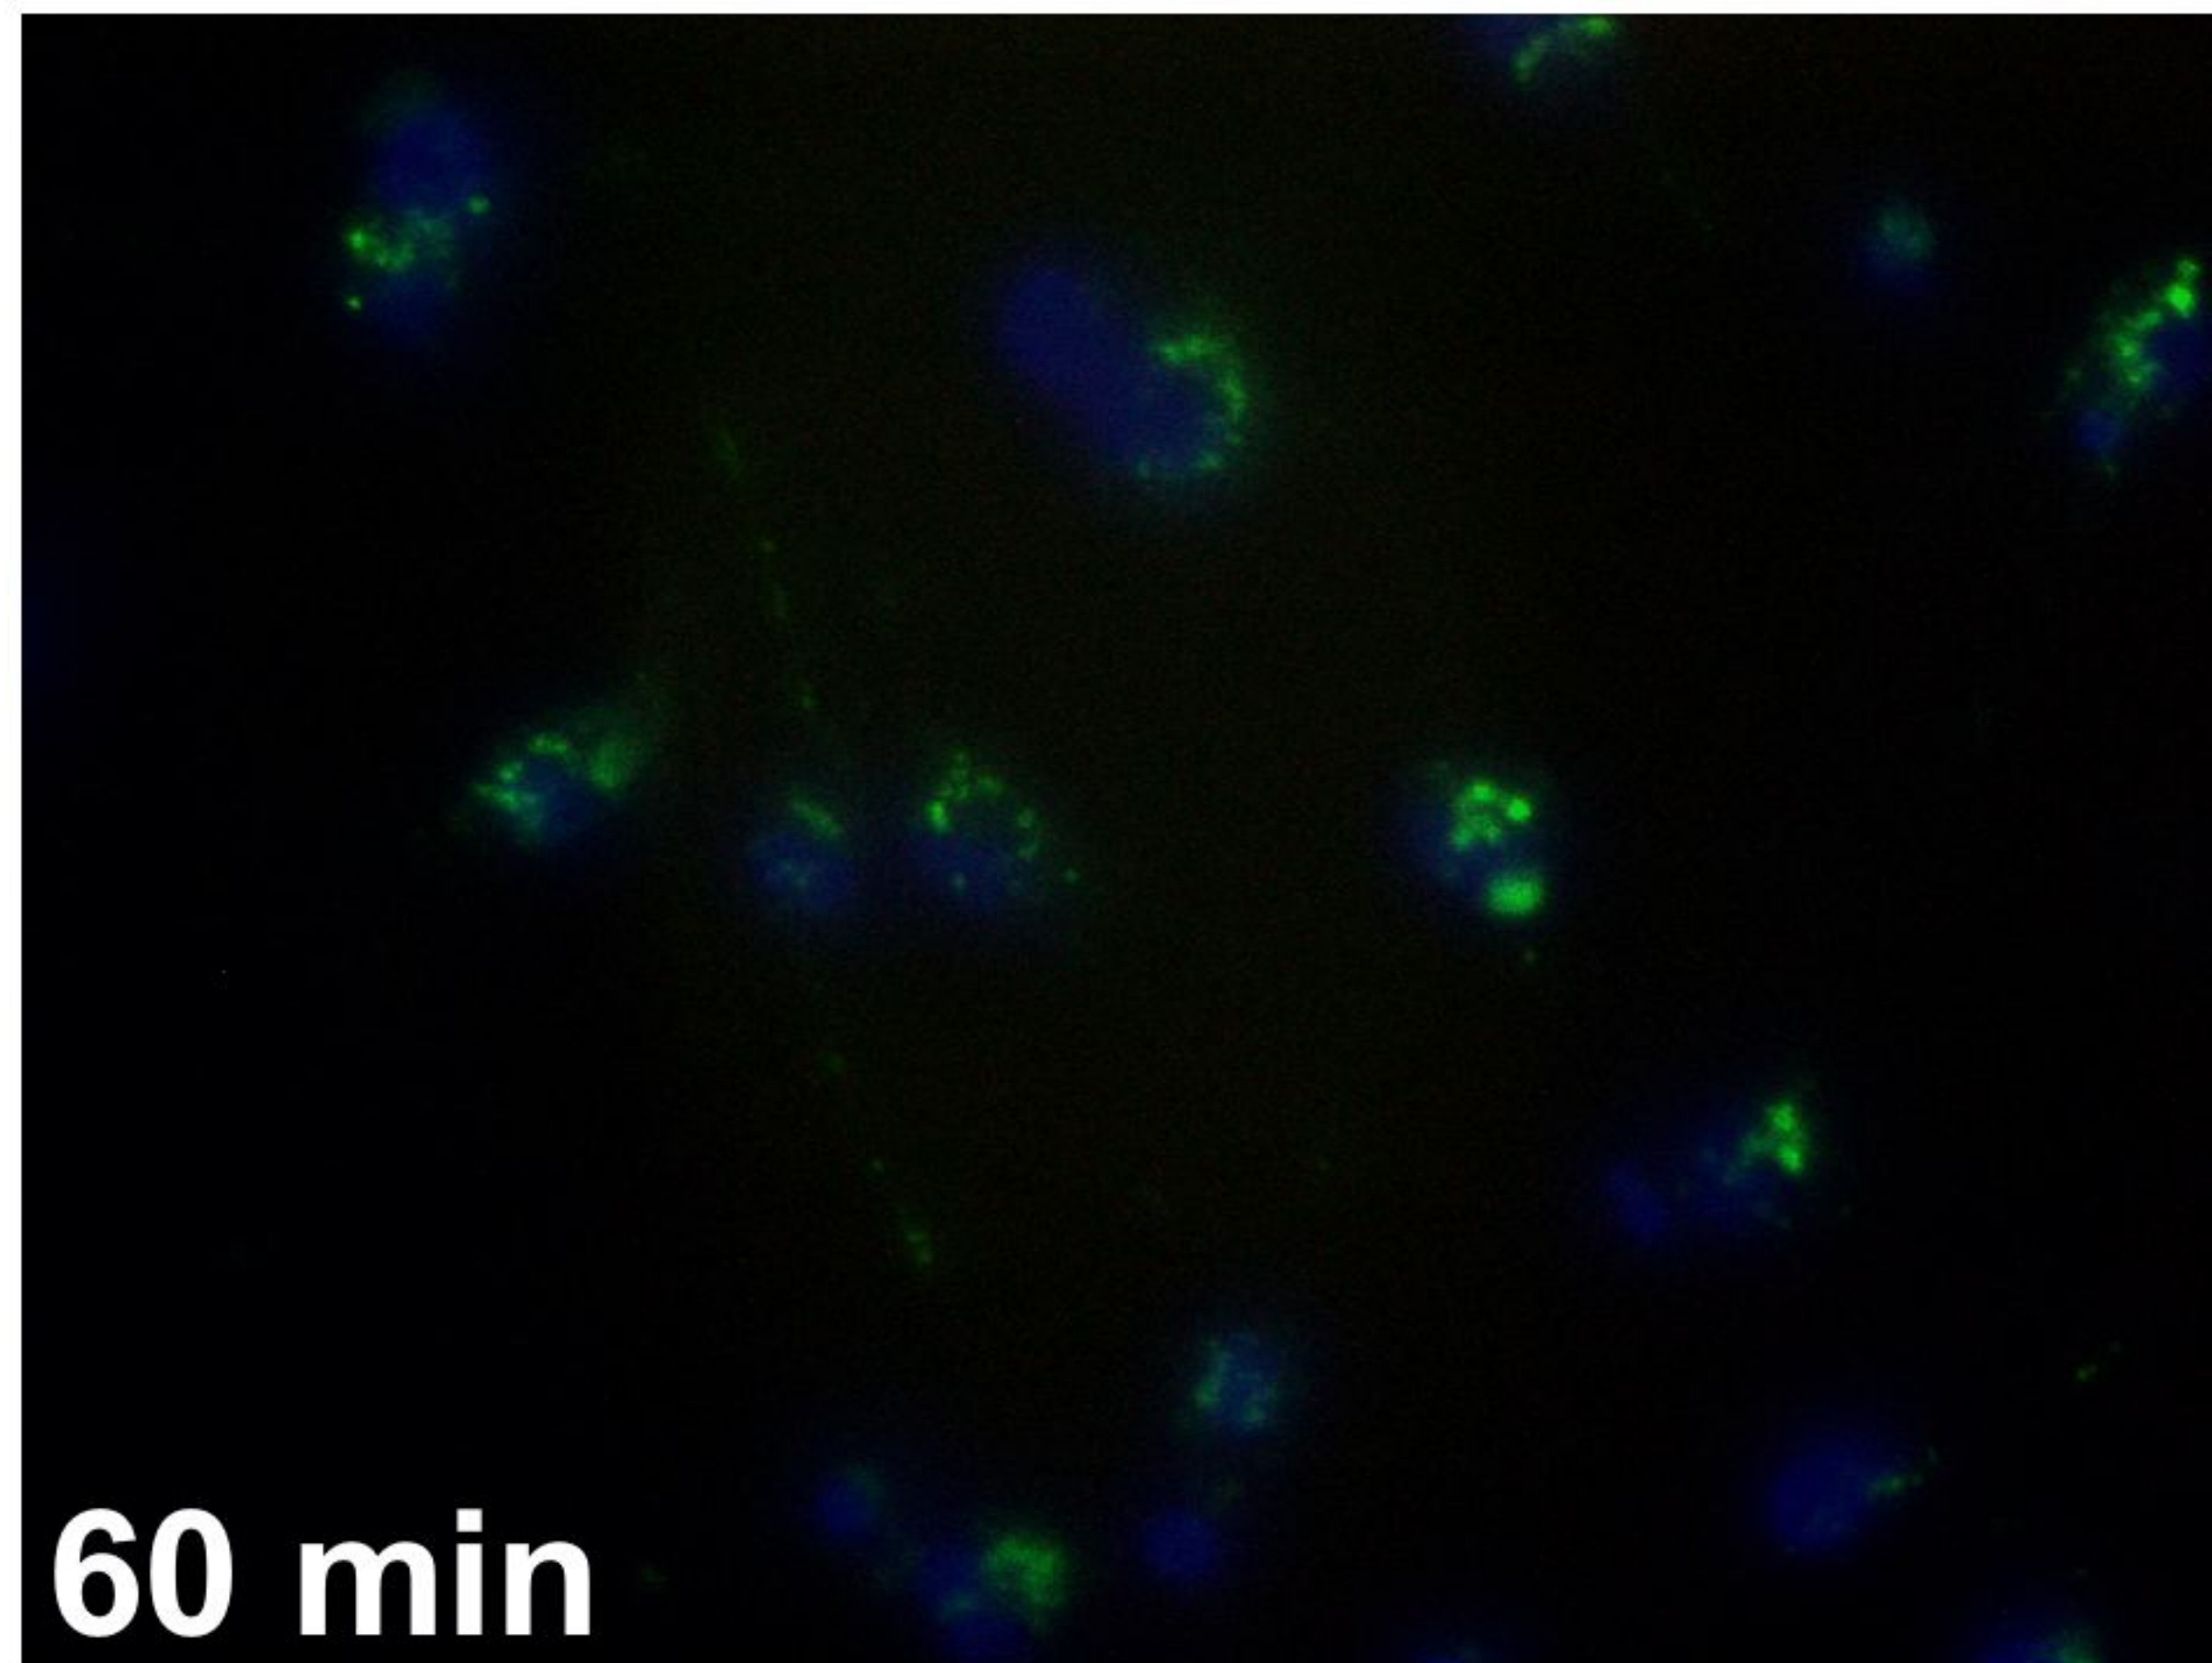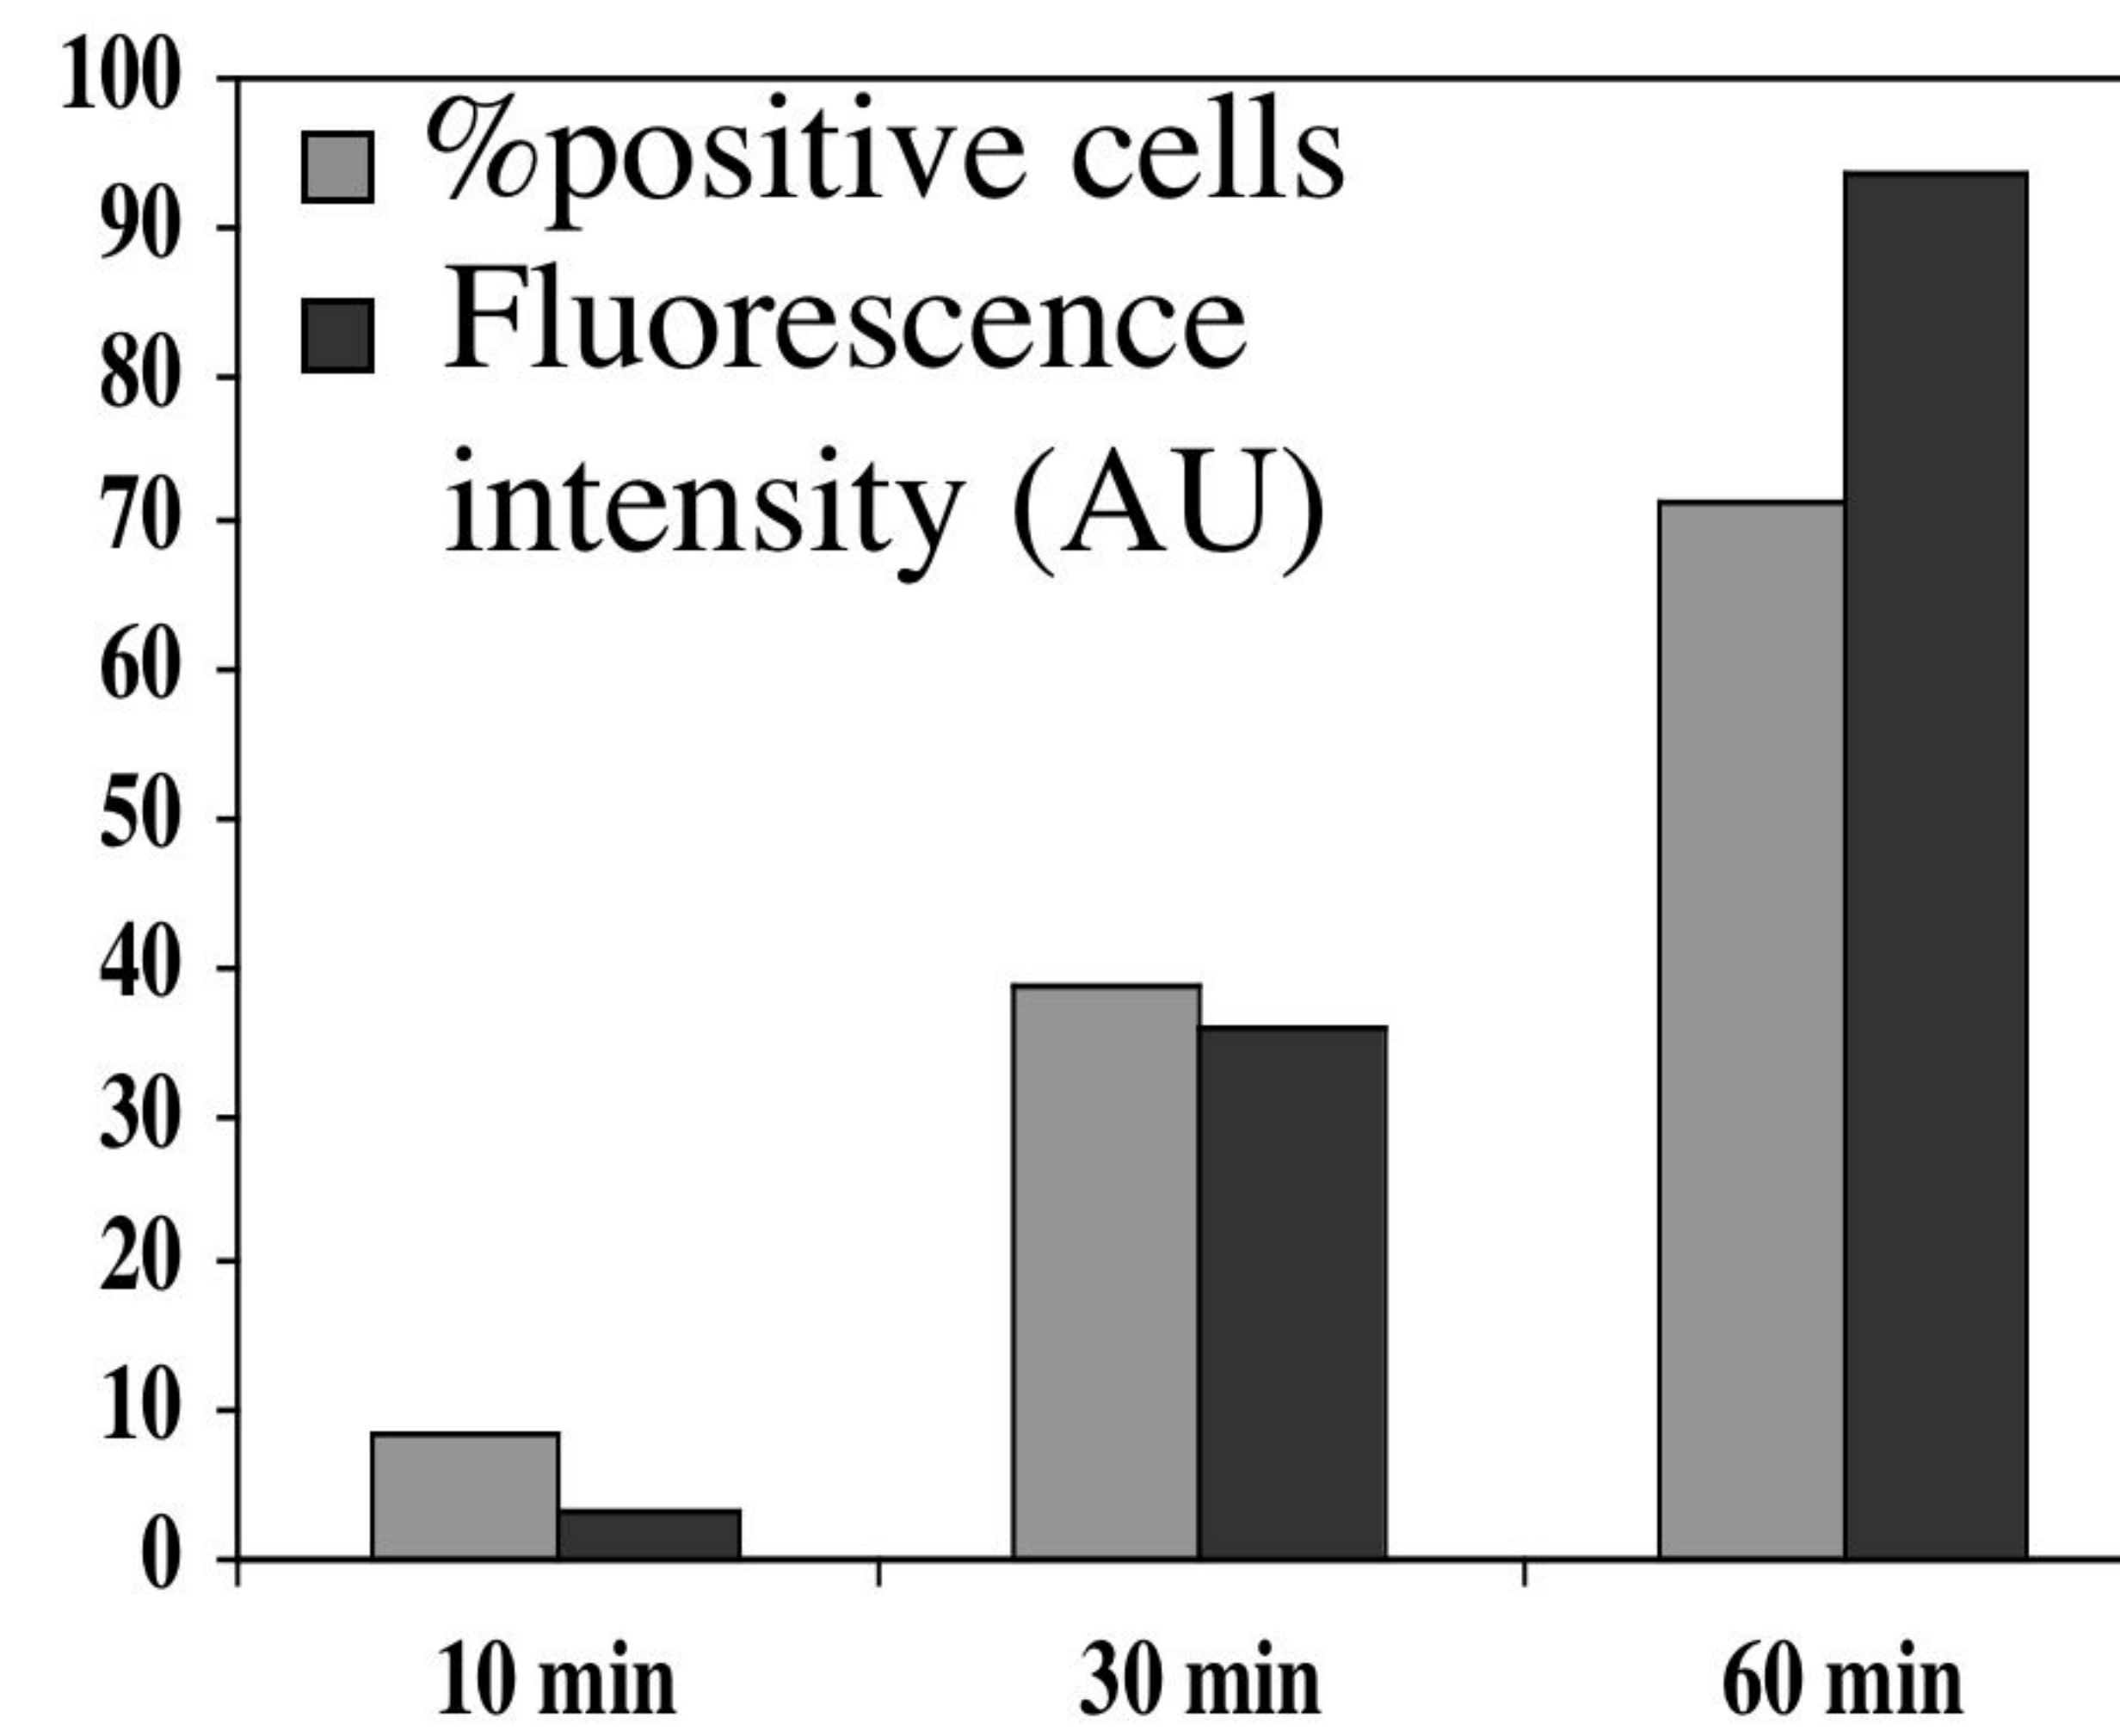

Supplement: amjpathol_170_3_921__1.pdf [file amjpathol_170_3_921__1.pdf]
